# Supplementary material for: Innovative synergistic control of electric fields and Zn2+ dynamics for revolutionizing zinc metal battery stability
Source: Royal Society of Chemistry journal article supplement (doi:10.1039/d4sc08518c), 2025-01-01
Supplement: d4sc08518c1.pdf [file d4sc08518c1.pdf]

# **Innovative Synergistic Control of Electric Fields and Zn<sup>2+</sup> Dynamics for Revolutionizing Zinc Metal Battery Stability**

Shengqiang Zhang<sup>1</sup>, Chengxin Liu<sup>2</sup>, Yangyang Wang<sup>2</sup>, Ao Xu<sup>2</sup>, Chunxia Chen<sup>2</sup>,  
Xiaojie Liu<sup>2\*</sup>

<sup>1</sup> *School of Chemistry and Chemical Engineering, Yan'an University, Yan'an 716000, China*

<sup>2</sup> *Key Laboratory of Synthetic and Natural Functional Molecule of the Ministry of Education, College of Chemistry & Materials Science, Northwest University, Xi'an 710127, P. R. China*

\* Corresponding Author:

E-mail address: xiaojie.liu@nwu.edu.cn (X. Liu)

## Experimental section

### Synthesis of Si@HMCS

Firstly, 0.2 g of silicon powder was oxidized in a muffle furnace at 650 °C for 2 h to obtain Si@SiO<sub>2</sub>. The prepared Si@SiO<sub>2</sub> was added to the mixed solution including deionized water (10 mL), anhydrous ethanol (60 mL), and ammonia solution (4 mL), and 4 ml of TEOS was added to the solution after stirring for 3 minutes. Then, a solution containing formaldehyde (0.56 mL) and resorcinol (0.42 g) was added above solution and continued to stir for 48 hours. Finally, Si@SiO<sub>2</sub>@C was obtained by annealing Si@SiO<sub>2</sub>@RF at 600 °C for 5 h under an argon atmosphere. Typically, Si@SiO<sub>2</sub>@C was etched by using hydrofluoric acid solution to obtain Si@HMCS.

### Synthesis of F-Si@HMCS

To synthesize F-Si@HMCS, Si@HMCS powder and NH<sub>4</sub>F particles were placed in a tubular furnace, positioned downstream and upstream, respectively, at a mass ratio of 5:1. The mixture was then annealed at 300 °C for two hours under an N<sub>2</sub> atmosphere to complete the process.

### Synthesis of $\alpha$ -MnO<sub>2</sub>

0.3 g manganese sulfate and 0.23 g potassium permanganate were separately dissolved in 15 mL ultra-pure water, stirred until completely dissolved, transferred to a hydrothermal kettle, hydrothermal reaction at 160 °C for 14 h, and then the reaction products were centrifugally washed and dried to obtain pure phase  $\alpha$ -MnO<sub>2</sub>.

### Structural Characterization

The crystalline structure and morphology of samples were analyzed by using X-ray powder diffraction (XRD, Bruker D8 ADVANCE), Scanning electron microscopy (SEM, accelerating voltage: 30 kV, Hitachi SU8010) and Transmission electron microscopy (TEM, Talos F200X, matching with STEM, and EDS mapping). X-ray photoelectron spectroscopy (XPS, PHI5000 VersaProbeIII) was utilized to dissect chemistry states of samples. The specific surface area and pore size distribution of samples were obtained using Brunauer-Emmett-Teller (BET) and calculated using Barrette-Joynere-Halenda (BJH) method. Raman spectroscopy was employed with an

excitation wavelength of 532 nm.

### **Electrochemical testing**

CR2025 coin cells were assembled using a glass fiber filter (GF-A, Whatman) as the separator in air to measure the electrochemical performance of samples. The Zn plating/stripping performance was studied in F-Si@HMCS@Zn//F-Si@HMCS@Zn (or bare Zn, Si@HMCS@Zn//Si@HMCS@Zn) symmetric cells. Asymmetrical cells used Cu foil as the cathode and F-Si@HMCS@Zn (or bare Zn, Si@HMCS@Zn) as the anode to analyze the nucleation process and Coulombic efficiency. The aqueous solution of 2 M ZnSO<sub>4</sub>+0.1 M MnSO<sub>4</sub> was used as the electrolyte. The full cells were assembled using MnO<sub>2</sub> as the cathodes and the F-Si@HMCS@Zn (or bare Zn, Si@HMCS@Zn) as the anode in the voltage range of 1.0–1.8 V vs. Zn/Zn<sup>2+</sup> and 0.35–1.4 V vs. Zn/Zn<sup>2+</sup>, respectively. Electrochemical workstation (Chen hua, CHI660E, Shanghai) was used record the LSV, CV, and EIS datas. LSV measurements F-Si@HMCS@Zn (or bare Zn, Si@HMCS@Zn) as the working the counter electrode with the SCE reference electrode in 1 M Na<sub>2</sub>SO<sub>4</sub>. The CV measurement was carried out at different scan rates with the voltage range from 1.0 to 1.8 V for Zn//MnO<sub>2</sub> cells. The EIS test was employed in the frequency range of 10<sup>-2</sup>–10<sup>6</sup> Hz.

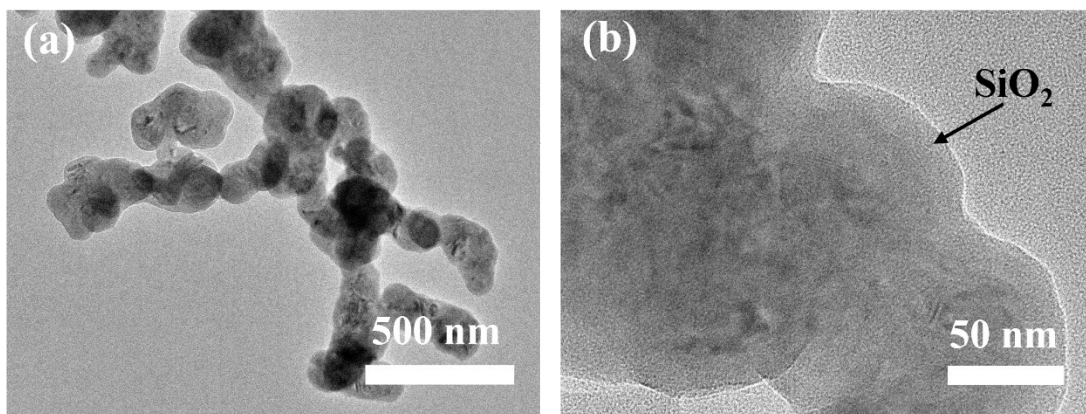

**Fig. S1** (a-b) TEM images of silicon powder after oxidation.

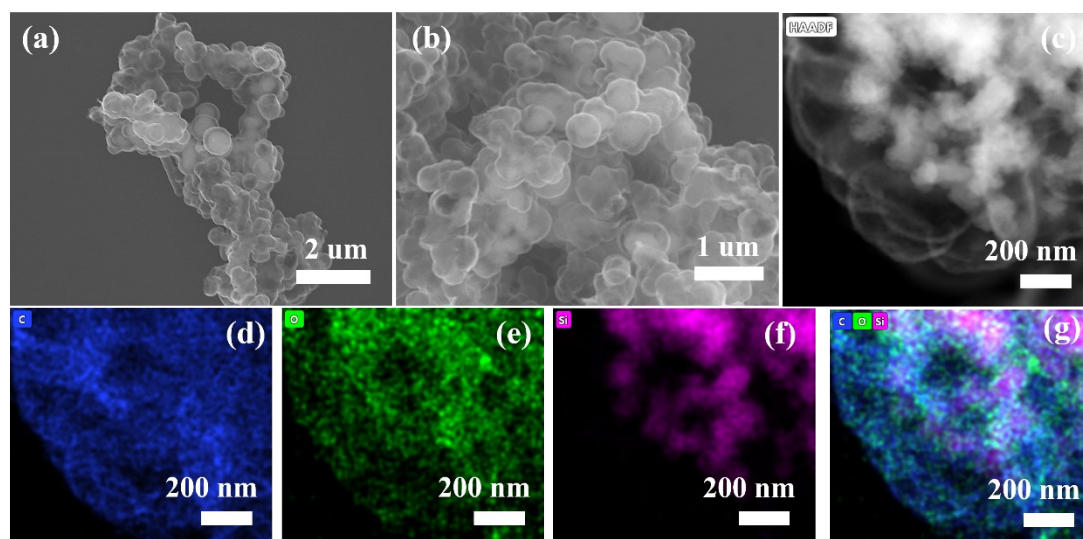

**Fig. S2** (a-b) TEM images of Si@HMCS. (c-g) The elemental mapping images of Si@HMCS.

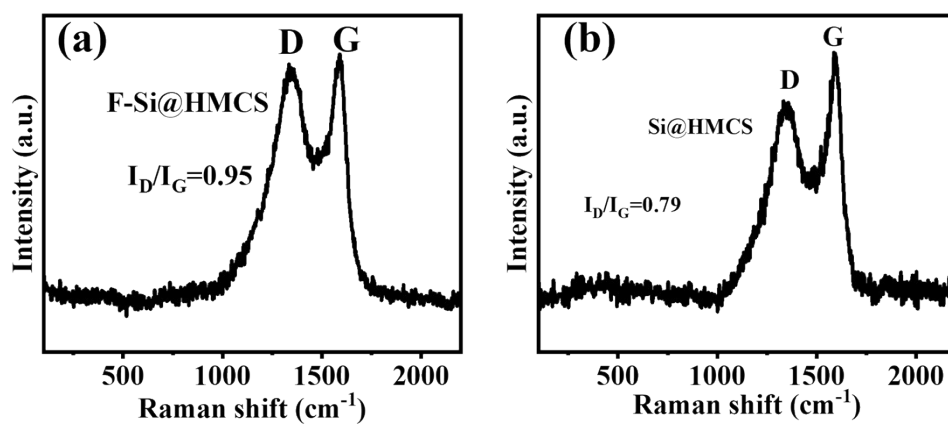

**Fig. S3** Raman spectra of (a) F-Si@HMCS; (b) Si@HMCS.

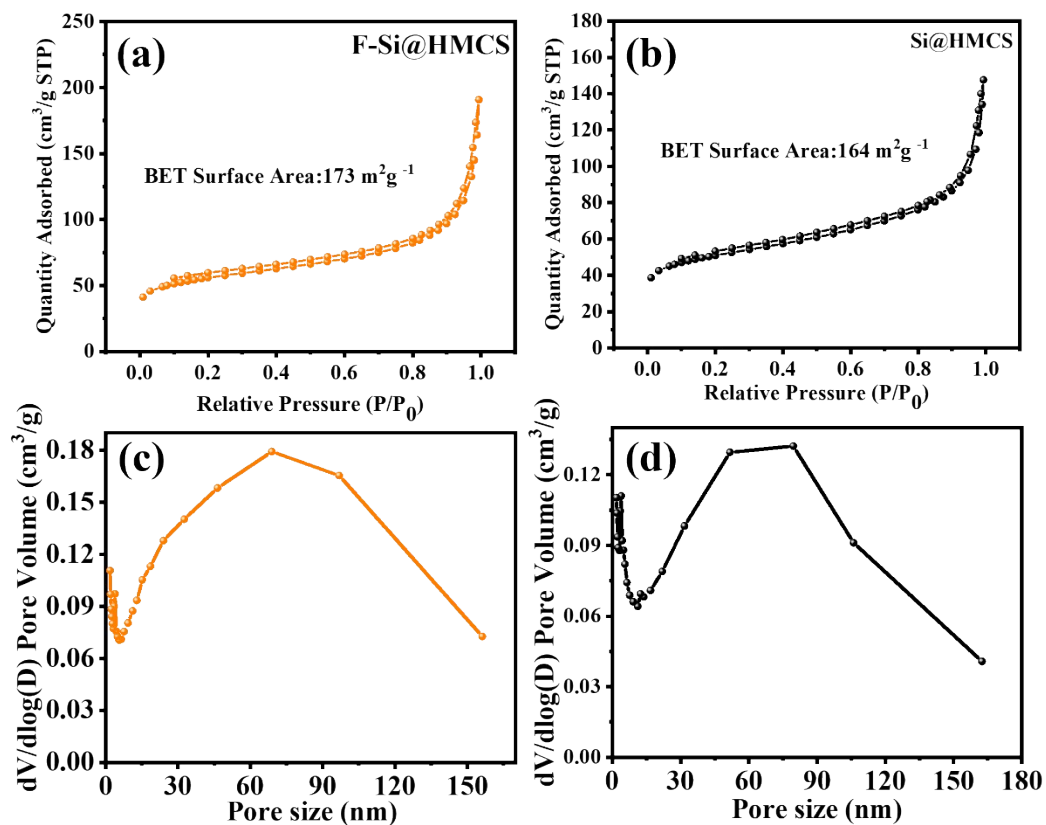

**Fig. S4** The N<sub>2</sub> adsorption/desorption isotherm of (a) F-Si@HMCS and (b) Si@HMCS. The corresponding pore-size distribution of (c) F-Si@HMCS and (d) Si@HMCS.

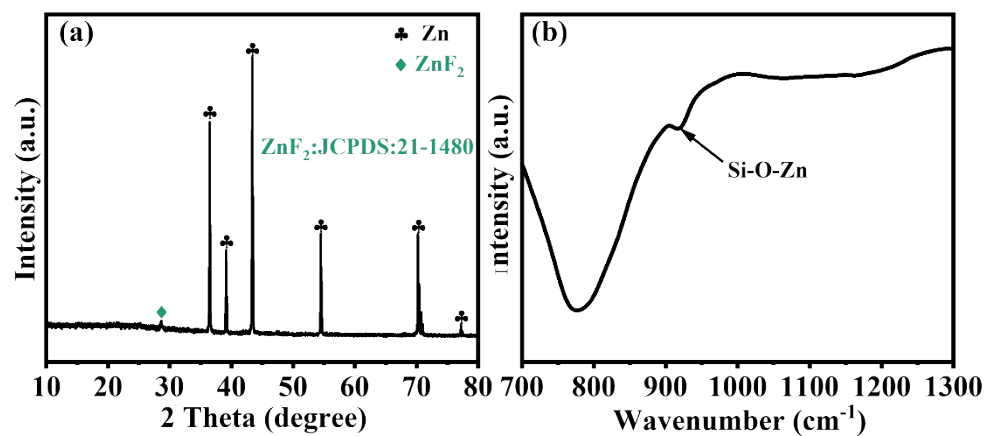

**Fig. S5** (a) XRD pattern of F-Si@HMCS@Zn electrode, (b) FTIR spectra of F-Si@HMCS@Zn electrode



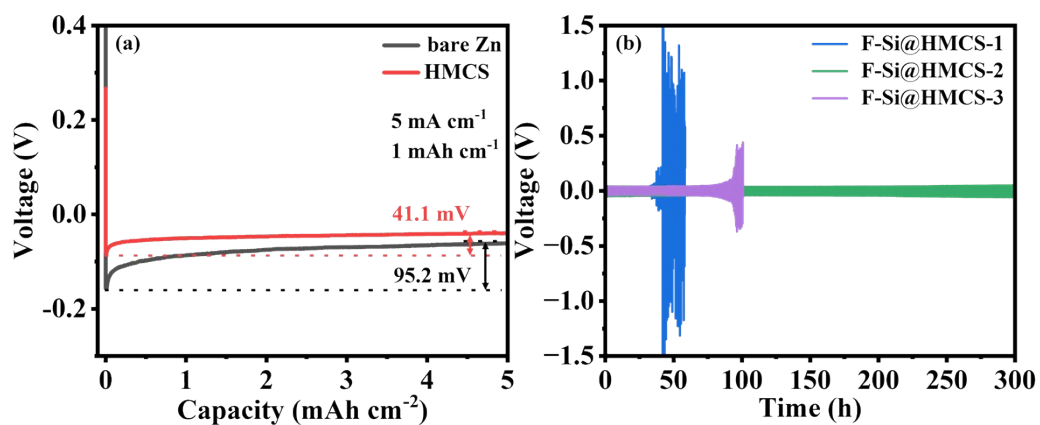

**Fig. S6** (a) Nucleation overpotentials on HMCS@Zn and bare Zn at current density of 5 mA cm<sup>-2</sup>. (b) Long-term cycling performance of F-Si@HMCS-1@Zn, F-Si@HMCS-2@Zn and F-Si@HMCS-3@Zn symmetric cells at current density of 5 mA cm<sup>-2</sup>

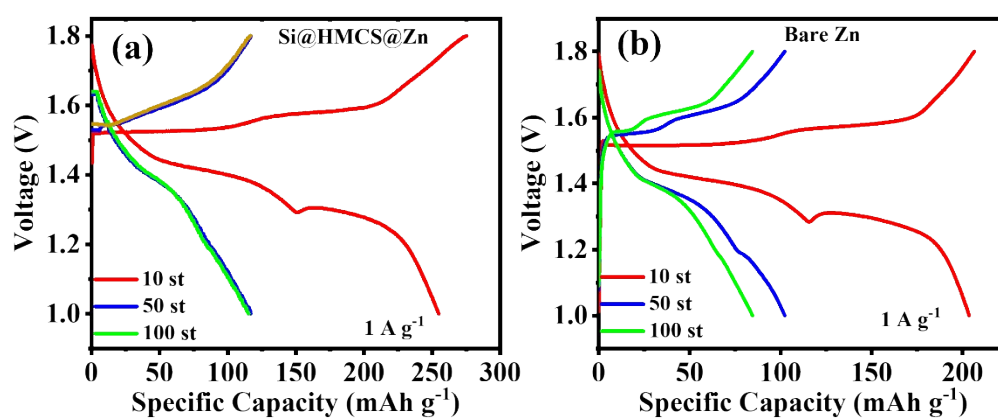

**Fig. S7** The charge-discharge curves of (a)  $\text{Si@HMCS@Zn//MnO}_2$  and (b) bare  $\text{Zn//MnO}_2$  after 10, 50, and 100 cycles at  $1 \text{ A g}^{-1}$

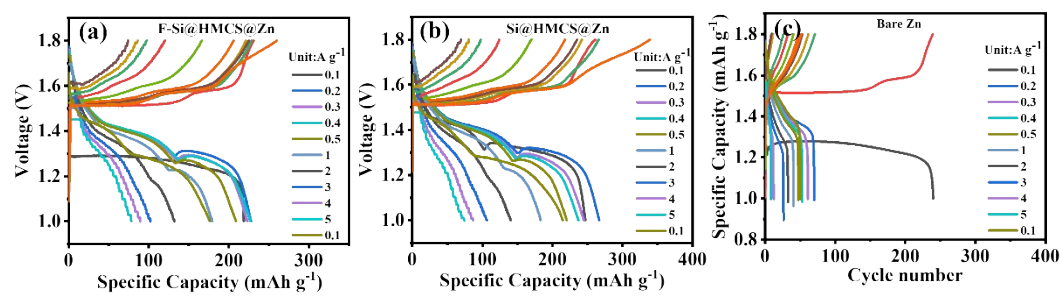

**Fig. S8** charge-discharge profiles of (a) F-Si@HMCS@Zn/MnO<sub>2</sub>, (b) Si@HMCS@Zn/MnO<sub>2</sub>, (c) bare Zn/MnO<sub>2</sub> at different current densities.

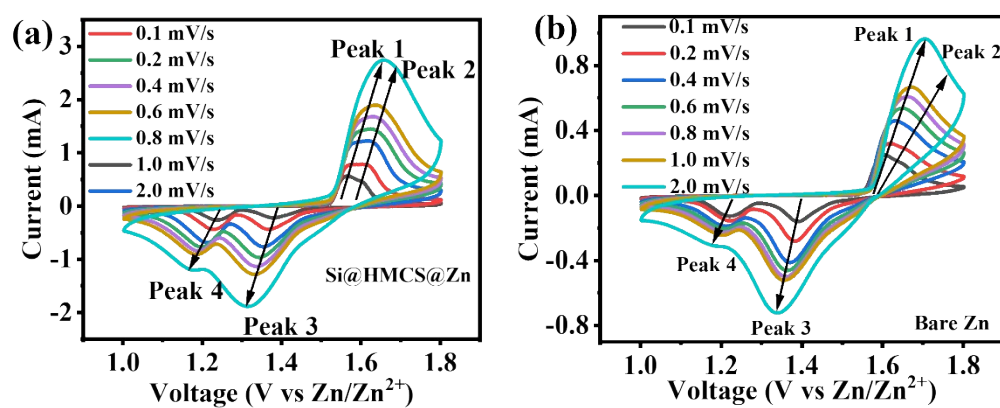

**Fig. S9** CV curve of (a) Si@HMCS@Zn//MnO<sub>2</sub> and (b) bare Zn//MnO<sub>2</sub> batteries at different scan rates

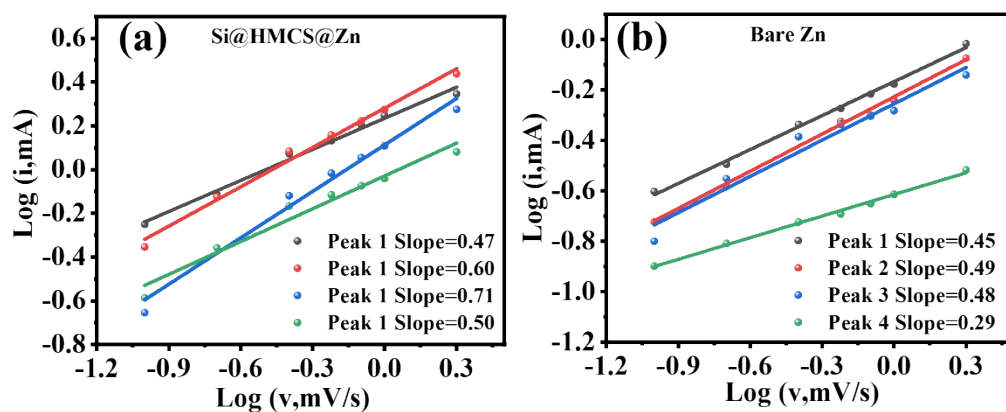

**Fig. S10** Fit plot of  $\log(i)$  vs.  $\log(v)$  in peaks 1, 2, and 3 and 4 for (a) Si@HMCS@Zn//MnO<sub>2</sub> and (b) bare Zn//MnO<sub>2</sub> batteries

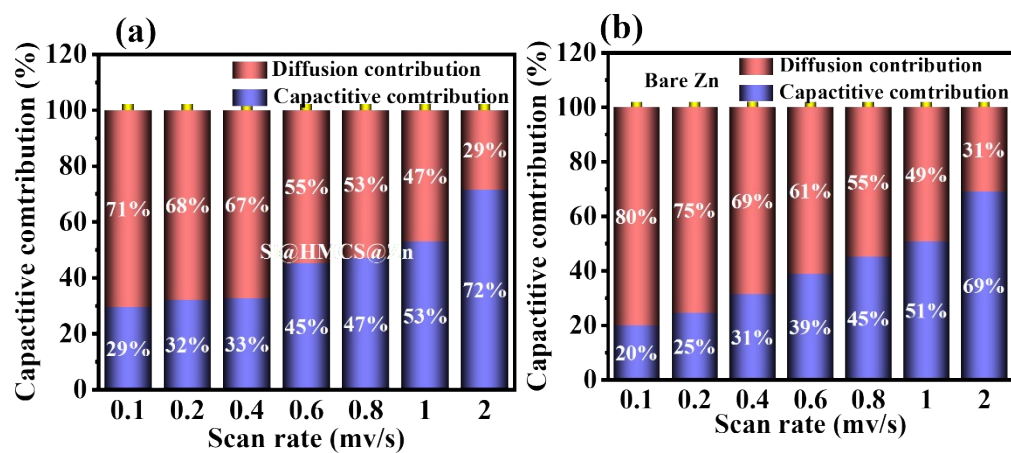

**Fig. S11** Pseudocapacitive contribution plots at different scan rates for (a) Si@HMCS@Zn//MnO<sub>2</sub>, (b) bare Zn
